# Supplementary material
Source: PubMed Central journal article supplement (PMC5785771)
Supplement: oc7b00440_si_001.pdf [file oc7b00440_si_001.pdf]

## Supporting Information

### Comparative nucleotide-dependent interactome analysis reveals shared and differential properties of KRas4a and KRas4b

Xiaoyu Zhang<sup>1</sup>, Ji Cao<sup>1</sup>, Seth P. Miller<sup>1</sup>, Hui Jing<sup>1</sup>, Hening Lin<sup>1,2\*</sup>

<sup>1</sup>Department of Chemistry and Chemical Biology, Cornell University, Ithaca, NY 14853

<sup>2</sup>Howard Hughes Medical Institute, Cornell University, Ithaca, NY 14853, USA

\*To whom correspondence should be addressed:

Hening Lin, Howard Hughes Medical Institute, Cornell University, Ithaca, NY 14853. E-mail:

[hl379@cornell.edu](mailto:hl379@cornell.edu)

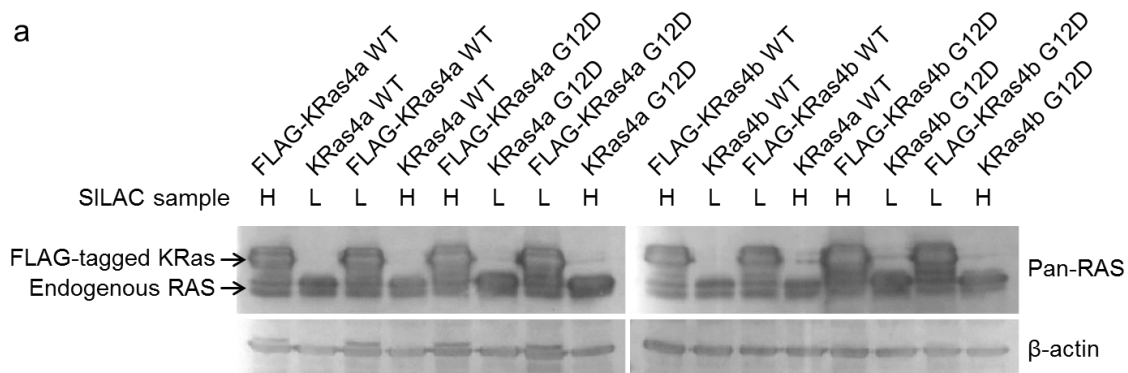

**b**

Sequence coverage, # peptides and heavy/light ratio of KRas4a/b

| Samples             | Sequence coverage (%) | # Peptides | Heavy/Light ratio |
|---------------------|-----------------------|------------|-------------------|
| KRas4a WT_Forward   | 75                    | 21         | 100               |
| KRas4a WT_Reverse   | 83                    | 23         | 0.01              |
| KRas4a G12D_Forward | 75                    | 21         | 100               |
| KRas4a G12D_Reverse | 77                    | 22         | 0.01              |
| KRas4b WT_Forward   | 83                    | 22         | 100               |
| KRas4b WT_Reverse   | 77                    | 21         | 0.01              |
| KRas4b G12D_Forward | 83                    | 24         | 100               |
| KRas4b G12D_Reverse | 79                    | 23         | 0.01              |

**Figure S1.** (a) KRas expression levels from each SILAC sample. (b) Sequence coverage, number of peptides, and heavy/light ratio of KRas from each SILAC result.
